# Supplementary material
Source: HighWire-hosted journal article supplement (https://genome.cshlp.org/content/suppl/2012/08/28/22.9.1616)
Supplement: Supp_References.docx [file Supp_References.docx]

**Supplemental References**

Cartegni L, Wang J, Zhu Z, Zhang MQ, Krainer AR. 2003. ESEfinder: A web resource to identify exonic splicing enhancers. *Nucleic Acids Res* **31:** 3568–3571.

Goren A, Ast G. 2006. ESRsearch. http://esrsearch.tau.ac.il.

Smith PJ, Zhang C, Wang J, Chew SL, Zhang MQ, Krainer AR. 2006. An increased specificity score matrix for the prediction of SF2/ASF-specific exonic splicing enhancers. *Hum Mol Genet* **15:** 2490–2508.

Stamm S, Riethoven JJ, Le Texier V, Gopalakrishnan C, Kumanduri V, Tang Y, Barbosa-Morais NL, Thanaraj TA. 2006. ASD: A bioinformatics resource on alternative splicing. *Nucleic Acids Res* **34:** D46–D55.

Yeo G, Burge CB. 2004. Maximum entropy modeling of short sequence motifs with applications to RNA splicing signals. *J Comput Biol* **11:** 377–394.
